# Supplementary material for: Synthesis of NaCl single crystals with defined morphologies as templates for fabricating hollow nano/micro-structures
Source: Royal Society of Chemistry journal article supplement (doi:10.1039/c4ra15385e), 2014-12-11
Supplement: c4ra15385e1.pdf [file c4ra15385e1.pdf]

## Supplementary Information

### Synthesis of NaCl single crystals with defined morphologies as templates for fabricating hollow nano/micron-structures

Bingbing Wang, Ping Jin\*, Yuanzheng Yue, Shidong Ji, Yamei Li, Hongjie Luo

#### Experimental Section

##### Synthesis of NaCl single crystals with certain morphology.

A NaCl-glycerol solution (1.6M) was heated at 140°C, and 0.1ml of the solution was added dropwise to a monohydric alcohol solution (20ml) agitated in ice bath for 5 minutes to obtain white precipitates. The precipitate was collected by centrifugation and washing with ethanol, and then preserved in vacuum for further measurements. The NaCl single crystals with RD morphology can be obtained by using the 2-propanol as solvent, while the NaCl submicro-cubes can be obtained when using the 2-butanol as solvent. The NaCl single crystals with Octahedron morphology were synthesised through aging the as-synthesized NaCl submicro-cubes without washing for 24 h in dry atmosphere.

Synthesis of NaCl with 8-fold flower-like morphology. Experimental section: 1, 3, 5, 7ml of H<sub>2</sub>SO<sub>4</sub> solution was mixed with 19, 17, 15, 13ml of ethanol respectively and labeled as H-Ethanol-1,2,3,4 solution, 0.1, 0.2, 0.3 and 0.4ml of NH<sub>4</sub>OH solution was mixed with 20ml ethanol respectively and labeled as N-Ethanol-1,2,3,4. A NaCl-glycerol solution (1.6M) was heated at 140°C, and 0.1ml of the solution was added dropwise to the mixed solution (20ml) agitated in ice bath for 5 minutes to obtain white precipitates. The precipitate was collected by centrifugation and washing with ethanol, and then preserved in vacuum for further measurements.

##### Synthesis of SiO<sub>2</sub> hollow nano/micro-structure particles.

TEOS (0.1ml), NH<sub>3</sub>·H<sub>2</sub>O (0.05ml) and H<sub>2</sub>O (0.05ml) were added into the isopropanol (20 ml) with precipitated RD-NaCl templates with average size of about 1.5µm (10mg) step by step, and the reaction took place at 0°C for 5 h. The

NaCl@SiO<sub>2</sub> core-shell products were collected by centrifugation. The NaCl@SiO<sub>2</sub> composites were calcined in air at 600°C to increase mechanical strength of the amorphous SiO<sub>2</sub>. After cooled down to room temperature, then the SiO<sub>2</sub> hollow nano/micro-structure particles can be obtained by washing with water and drying for 24h at 80°C.

### **Synthesis of TiO<sub>2</sub> hollow nano/micro-structure particles**

Deionized water (0.2ml) and TBT solution (0.5ml) in isopropanol (5ml) respectively at room temperature were added dropwise into the isopropanol (20ml) with precipitated NaCl templates (10mg) under stirring within 30 min. The mixture was stirred for 1h and then heated to 50 °C for another 1.5 h. The NaCl@TiO<sub>2</sub> composites were calcined in air at 650°C to crystallize the amorphous TiO<sub>2</sub>. After cooled down to room temperature, then the TiO<sub>2</sub> hollow nano/micro-structure particles can be obtained by washing with water and drying for 24h at 80°C.

### **Instrumentation:**

Powder XRD measurements were performed on a Philips Xpert. Advance diffractometer using CuK- $\alpha$  radiation ( $\lambda=0.154056\text{nm}$ ). The TEM images were obtained using a JEOL JEM-2010F FETEM. The SEM measurements were conducted using a JEOL S-4800 FESEM.

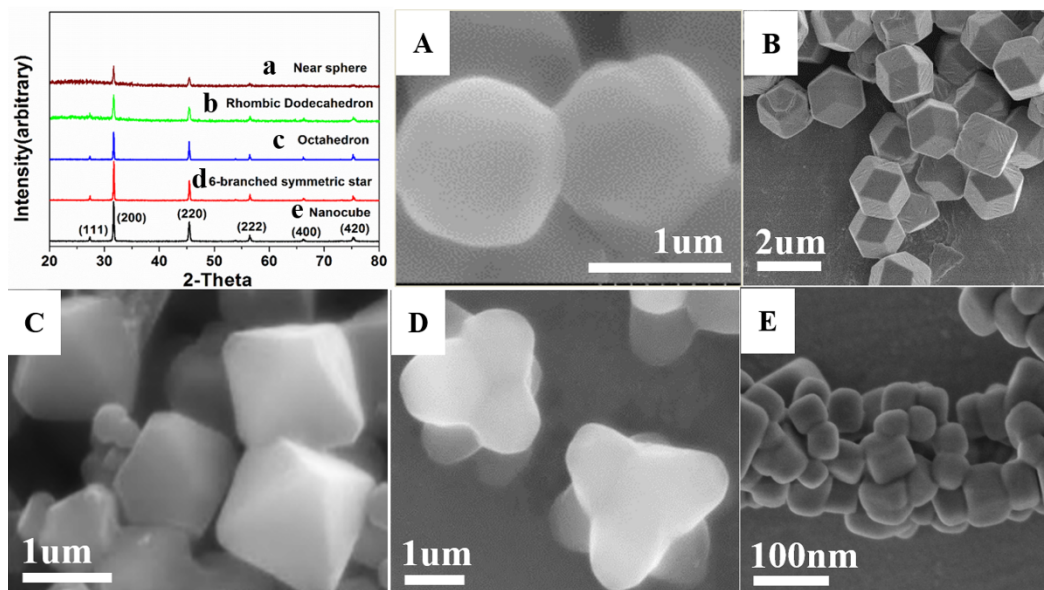

**Figure S1.** XRD pattern of the as-prepared NaCl with different morphologies: Near sphere (wine red), RD (green), Octahedron (blue), 6-branched symmetric star (red) and Nanocubes (black).

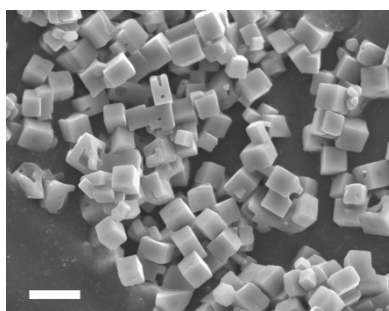

**Figure S2.** SEM image of the NaCl crystals prepared by adding aqueous NaCl to 2-propanol. Scale bar, 10 μm.

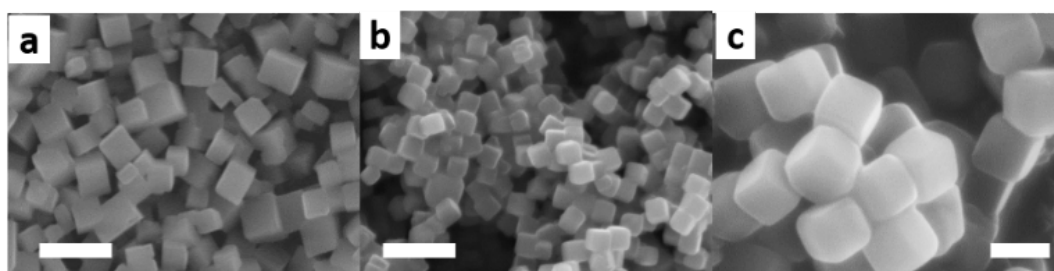

**Figure S3.** SEM images of the NaCl single crystals prepared in ethanol (a), propanol (b) and butanol (c) solvents as alternative to the 2-propanol. The scale bars in a, b and c are 5 μm, 3 μm and 1 μm respectively.

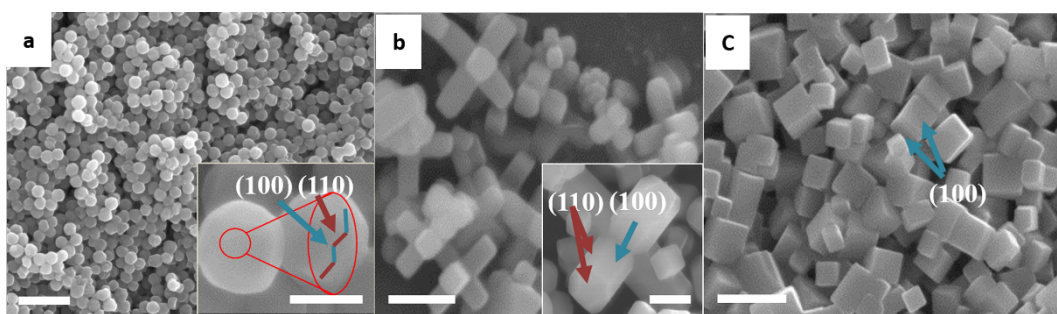

**Figure S4.** SEM images of the NaCl single crystals with different morphologies obtained by adding different amount of NaCl-glycerol (a) 0.15ml, (b) 0.2ml and (c) 0.3ml into the isopropanol (20ml). The scale bars in a, b and c are 5 $\mu$ m, 3 $\mu$ m and 10 $\mu$ m respectively, and the inset scale bar in a and b are 1 $\mu$ m and 2 $\mu$ m.

The morphology of NaCl single crystals can be strongly affected by the relative supersaturation of NaCl, which can be modulated by adjusting the amount of NaCl-glycerol solution or the type of solvents used for precipitation. With a fixed NaCl concentration of 1.6 M, for example, the RD NaCl crystals (Figure 1) were obtained by adding 0.1 ml NaCl-glycerol solution to 20 ml 2-propanol solvent. A dramatic change in morphology occurs when increasing the amount of NaCl-glycerol solution. As demonstrated in Figures S5 a, b and c, (ESI†) adding the NaCl-glycerol amount of 0.15, 0.2 and 0.3 ml to the 2-propanol solvent lead to formation of NaCl crystals with near sphere, 6-fold symmetric star, and cube morphologies, respectively.

From thermodynamics and Thomson-Gibbs equation, the morphological change can be attributed to the fact that the surface of crystals can be easily controlled via simply adjusting supersaturation of crystal growth units in the growth medium during the crystal growth process. As a result, the crystal growth along  $\langle 110 \rangle$  direction will be accelerated, and the  $\{110\}$  surfaces tend to be unstabilized and replaced gradually by the  $\{100\}$  low-energy ones. When increasing the adding amount of NaCl-glycerol solution, the surfaces of the NaCl crystals were enclosed by both  $\{110\}$  and  $\{100\}$  ones. As the crystal grow along six  $\langle 110 \rangle$  directions, then the near sphere (Figures S5a) and 6-fold symmetric star NaCl crystals (Figures S5b) formed gradually. When the relative supersaturation of NaCl increased to the extremely, the nucleation rate alone  $\langle 110 \rangle$

directions were the fastest ones, then  $\{110\}$  surfaces of NaCl were thoroughly substituted by  $\{100\}$  ones, and NaCl cubes formed (Figures S5c).

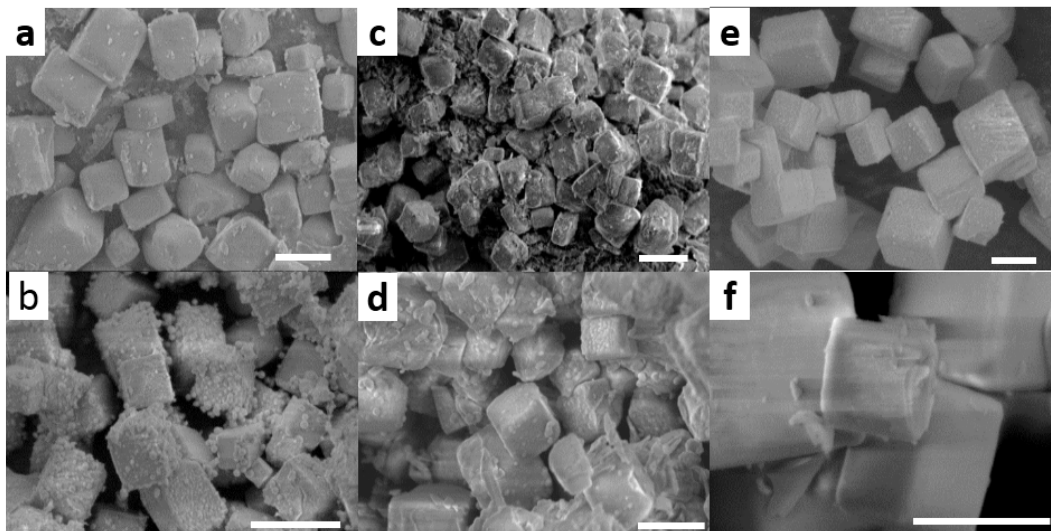

**Figure S5.** SEM images (a-f) of the NaCl@SiO<sub>2</sub> core-shell products corresponding with the ratios of TEOS: NH<sub>3</sub>H<sub>2</sub>O: H<sub>2</sub>O (1-6) in Table S1. The scale bars in a, b, c, d, e and f are 5 $\mu$ m, 10 $\mu$ m, 1 $\mu$ m, 10 $\mu$ m, 5 $\mu$ m and 5 $\mu$ m respectively

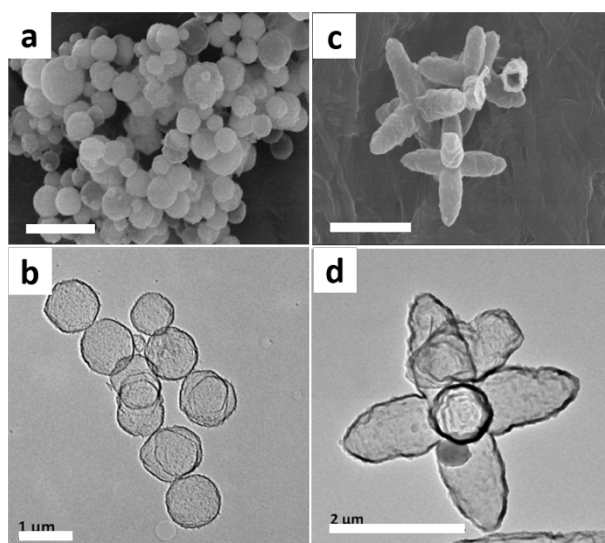

**Figure S6.** SEM and TEM images of SiO<sub>2</sub> hollow structures with morphologies of spheres (a, b), and 6-fold symmetric star structures (c, d) fabricated using the NaCl WSGT. The scale bars in a, b, c, and d are 2 $\mu$ m, 1 $\mu$ m, 3 $\mu$ m, and 2 $\mu$ m respectively.

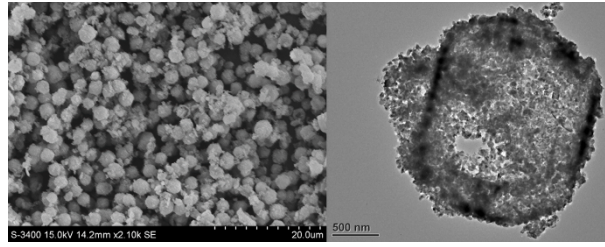

**Figure S9.** SEM and TEM images of TiO<sub>2</sub> RD-hollow structures fabricated using the NaCl WSGT. The scale bars in a, and b are 20μm, and 0.5μm respectively.

**Table S1**

| Serial number | NaCl (g) | TEOS (ml) | NH <sub>3</sub> ·H <sub>2</sub> O (ml) | H <sub>2</sub> O (ml) | Products |
|---------------|----------|-----------|----------------------------------------|-----------------------|----------|
| 1             | 1        | 0.5       | 0.5                                    | 0.5                   | a        |
| 2             | 1        | 1         | 1                                      | 1                     | b        |
| 3             | 1        | 0.8       | 0.4                                    | 0.8                   | c        |
| 4             | 1        | 0.8       | 0.8                                    | 0.8                   | d        |
| 5             | 1        | 0.8       | 0.4                                    | 0.6                   | e        |
| 6             | 1        | 0.8       | 0.4                                    | 0.4                   | f        |
| 7             | 1        | 0.8       | 0.4                                    | 0.3                   | Failed   |
| 8             | 1        | 0.8       | 0.4                                    | 7                     | Failed   |

**Table S1.** The coating ratio of TEOS: NH<sub>3</sub>H<sub>2</sub>O: H<sub>2</sub>O and NaCl<sup>†</sup>.

- (1) The coating ratio of TEOS: NH<sub>3</sub>H<sub>2</sub>O: H<sub>2</sub>O are taken from 0.5:0.5:0.5 to 0.8:0.4:0.7 while the quality of the NaCl microcubic crystal templates with average size of about 5μm are 1g. The as-prepared NaCl@SiO<sub>2</sub> from sample-1 to sample-6 was shown in figure S5. The coating process 7 and 8 were failed for no TEOS hydrolyzing or only silica particles observed confirmed by water dissolution.
